# Supplementary material for: Shear thickening behavior in dense repulsive and attractive suspensions of hard spheres
Source: Royal Society of Chemistry journal article supplement (doi:10.1039/d1sm00971k), 2021-01-01
Supplement: d1sm00971k1.pdf [file d1sm00971k1.pdf]

## Shear thickening behavior in dense repulsive and attractive suspensions of hard spheres

Vikram Rathee, Alessandro Monti, Marco E. Rosti and Amy Q. Shen

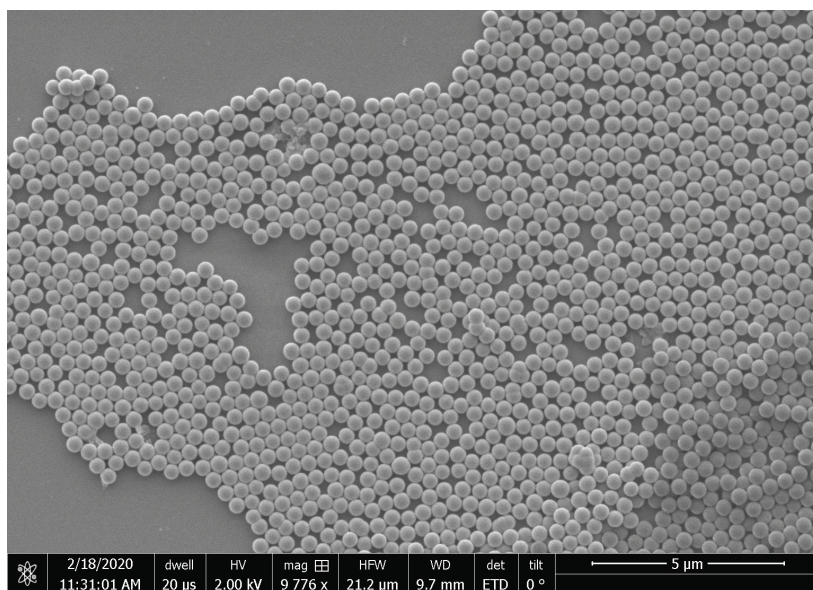

FIG. S1: SEM image of silica particles synthesized and used in our experiments. The average diameter of the particles is  $415 \pm 20$  nm. SEM was performed on FEI Quanta 250 FEG (Thermo Fisher Scientific). The vacuum chamber pressure was maintained at  $10^{-4}$  Pa.

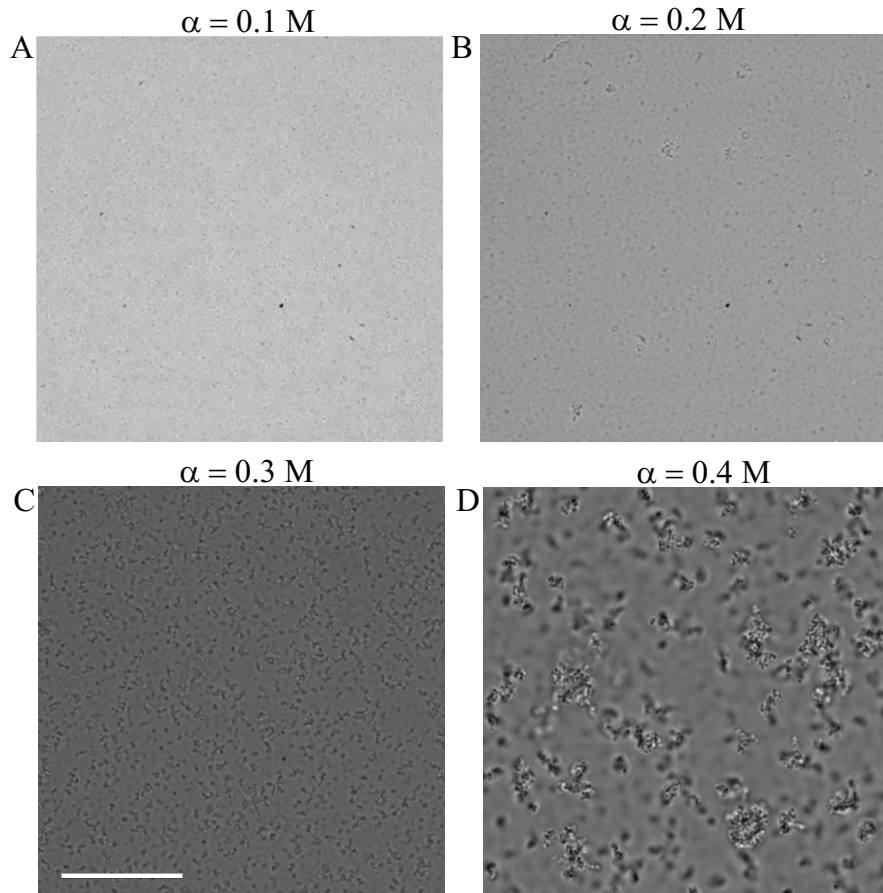

FIG. S2: Optical microscopic images of colloidal particle suspended in water at different sodium chloride concentrations ( $\alpha$ ): (A)  $\alpha = 0.1$  M; (B)  $\alpha = 0.2$  M; (C)  $\alpha = 0.3$  M; (D)  $\alpha = 0.4$  M. The volume fraction  $\phi$  of the particles was fixed at 0.5%. The scale bar corresponds to  $50\mu\text{m}$  for all images. The images were captured on Nikon Eclipse Ti optical microscope at  $25^\circ\text{C}$ .

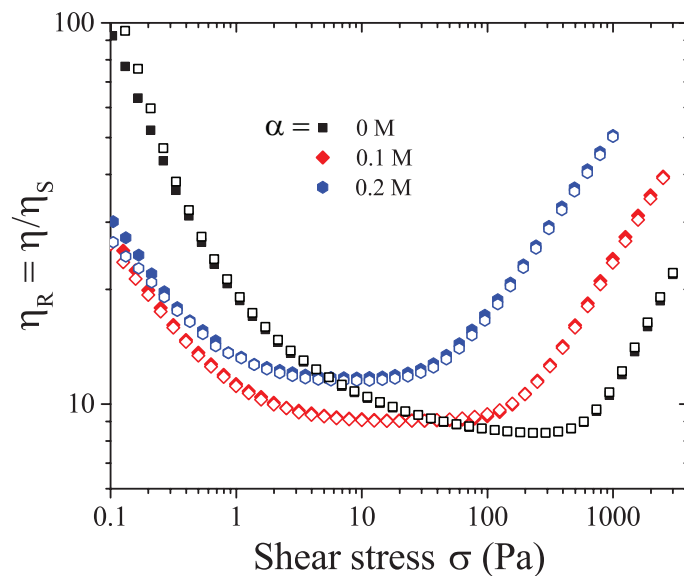

FIG. S3: Relative viscosity  $\eta_R$  versus shear stress  $\sigma$  at  $\phi = 0.5$  and  $\alpha = 0$  M (squares),  $\alpha = 0.1$  M (diamonds), and  $\alpha = 0.2$  M (hexagons). Forward and reverse flow curve measurements are shown by filled and open symbols, respectively. All flow curve measurements were performed after pre-shearing the sample for  $10\text{ s}^{-1}$  for a minimum of 100 s. The waiting time 5 s was held at each stress value. The temperature was fixed at  $10^\circ\text{C}$ .
